# Supplementary material for: Defining Microbial Community Functions in Chronic Human Infection with Metatranscriptomics
Source: PubMed Central journal article supplement (PMC10274682; doi:10.1101/2023.06.06.543868), 2023-06-07
Supplement: media-1.pdf [file media-1.pdf]

1 **Supplementary Material**

2 **Materials and Methods**

3 **Dataset Collection:** The datasets used for this study were identified by body part or tissue being  
4 affected in samples collected – chronic lower extremity ulcers for CW samples and sputum  
5 samples from people with CF, presence of original metatranscriptomic data, presence of  
6 comorbidities in patients and treatment course.

7

8 **Community Composition Analysis:** We reduced our Metaphlan4 output data to genera and  
9 species that had at least one percent abundance prevalence in at least 3 samples.

10

11 **Functional Profiling:** Two bioinformatic tools were used for functional profiling. The Simple  
12 Annotation of Metatranscriptomes by Sequence Analysis tool (SAMSA2) identified 4527 level 4  
13 enzyme classes and the DIAMOND\_analys\_counter.py scripts were used to aggregate the  
14 outputs which were eventually exported to R studio for statistical analysis. The diversity\_stats.R  
15 script of the SAMSA2 package was used to compute the mean Shannon and Simpson diversity  
16 indices for the two infection communities and the diversity\_gaphs.R script was used to plot the  
17 graphs of these. We performed differentially expression analysis of the features in the both  
18 communities using the run\_DESeq\_stats.R script. The HMP Unified Metabolic Analysis Network  
19 (HUMANn3) tool, identified 594,273 UniRef protein families which were further regrouped to 2459  
20 unique ECs using the humann\_regroup\_table command and exported to Rstudio for differential  
21 expression analysis.

22

23 **Statistical Analyses:**

24 For the HUMANn3 functional analyses, we performed differential expression analysis using  
25 DESeq2 1.38.3 and MaAsLin2 1.12.0 in R studio.

26 **Figures**

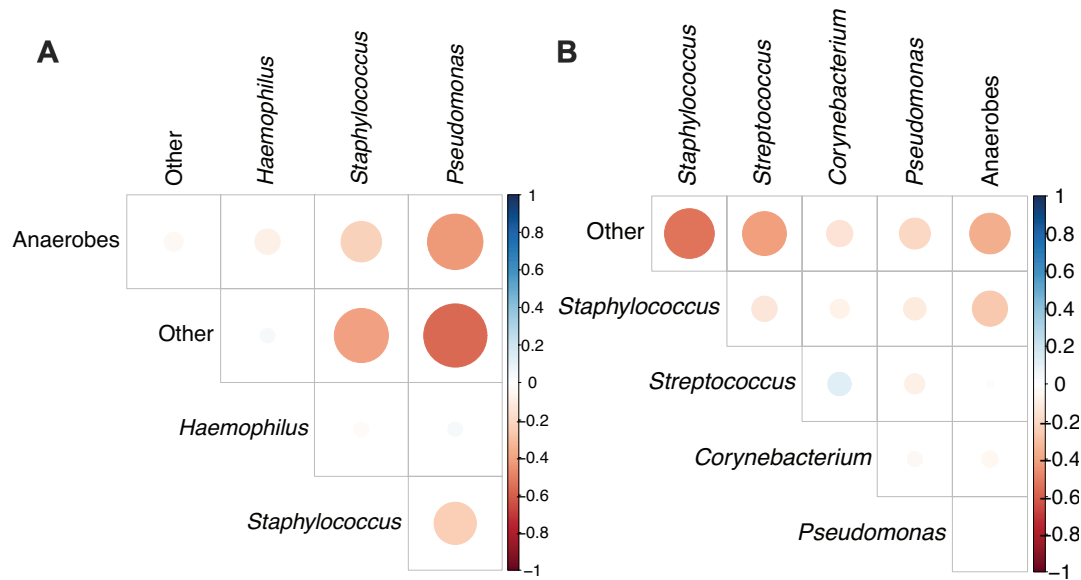

27  
 28 **Figure S1:** Co-occurrence of obligate anaerobes and traditional pathogens in CF and CW  
 29 samples. **A)** Obligate anaerobes (*Prevotella*, *Actinomyces*, *Veillonella* & *Fusobacterium*) have  
 30 negative correlation with CF pathogens (*Pseudomonas*, *Staphylococcus*, & *Haemophilus*). **B)**  
 31 Obligate anaerobes (*Finnegoldia*, *Anaerococcus*, *Peptoniphilus*, *Peptostreptococcus*, *Parvimonas*  
 32 and *Peptococcus*) have negative correlation with CW pathogens (*Staphylococcus*,  
 33 *Streptococcus*, *Pseudomonas*, and *Corynebacterium*). **A&B** show the Pearson correlation  
 34 coefficients between the sum of the relative abundances of the anaerobes and each indicated  
 35 pathogen. Other bacterial genera present in the community are grouped as other.

36  
 37

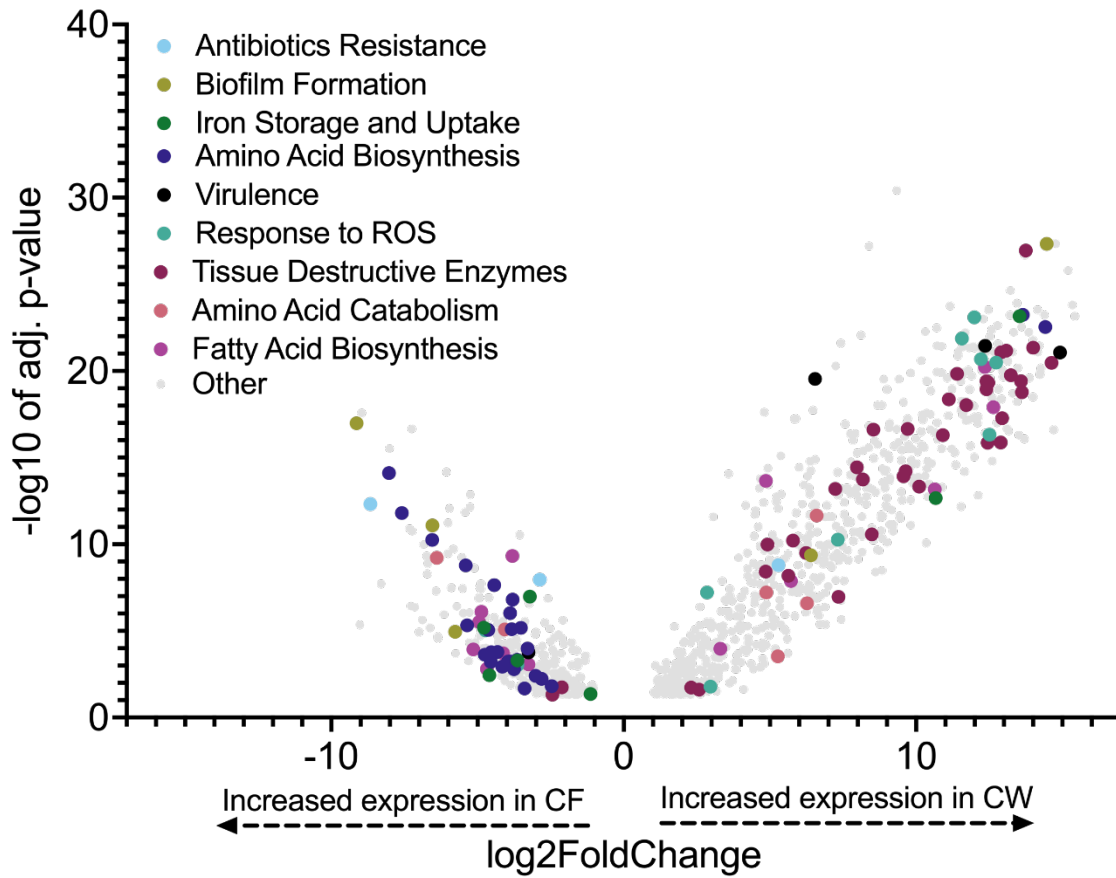

38  
 39  
 40  
 41  
 42  
 43

**Figure S2:** Volcano plot to highlight differentially expressed functions in both infection communities as identified by HUMANN3. 42.98% of the functions were differentially expressed (adjusted p-value < 0.05, log<sub>2</sub>FoldChange > 1).

44 **Supplementary Datasets**

45 **Dataset S1:** Detailed metadata on all samples used for the study.

46

47 **Dataset S2:** Functional analysis data. Sheet 1 - highlighted conserved functions identified with  
48 HUMANn3 and SAMSA2 and bacterial contribution to these functions. Sheet 2 - highlighted  
49 differentially expressed functions identified with HUMANn3 and SAMSA2 and bacterial  
50 contribution to these functions. Sheet 3 - all differentially expressed functions obtained from  
51 HUMANn3. Sheet 4 - all differentially expressed functions obtained from SAMSA2.

52

53 **Dataset S3:** Pathway analysis data. Sheet 1- all pathway analysis data as identified by  
54 HUMANn3. Sheet 2 - all differentially expressed pathways obtained from HUMANn3.
